# Supplementary material for: Recombinant Zika NS1 Protein Secreted from Vero Cells Is Efficient for Inducing Production of Immune Serum Directed against NS1 Dimer
Source: PubMed Central journal article supplement (PMC5795988; doi:10.3390/ijms19010038), 2017-12-23
Supplement: ijms-19-00038-s001.pdf [file ijms-19-00038-s001.pdf]

atgCTCGCTCTCGGAGGAGTGCTCATCTTCTCCTGTCCACCGCTGTGTCCGCTGATGTGGGATGTTCCGTGGATTTCTCAA  
GAAGGAGACCCGCTGCGGAACCGGAGTGTTCGTCTACAACGACGTGGAGGCATGGAGAGACAGGTACAAGTACCACCCTG  
ACTCCCCAGGCGCTTGGCTGCAGCAGTCAAGCAGGCCTGGGAAGATGGAATCTGTGGGATCTCCTCCGTGTACCGGATG  
GAGAACATCATGTGGCGGTCCGTGGAGGGGAATTGAACGCCATCCTTGAGGAGAACGGGGTGCAGCTTACCGTGTGGT  
GGGGTCTGTCAAAAACCCATGTGGCGGGGCCACAAAGACTCCCTGTGCCTGTGAACGAACTTCTCACCGCTGGAAGG  
CCTGGGGAAATCTTACTTCTCGTCCGGGCCCAAGACAAACAACCTCCTTCGTTCGTGGATGGCGATACCTTGAAGGAGTGC  
CCACTGAAGCACCGGGCTGGAATTCTTTTCTGGTGGAGGATCACGGGTTTGGGGTCTTTCACACCAGCGTCTGGCTCAA  
GGTGCGGGAGGACTACAGCCTGGAGTGCATCCAGCCGTGATCGGGACAGCCGTGAAAGGGAAGGAAGCCGTCCATAGTG  
ATCTGGGCTACTGGATCGAGAGCGAGAAGAACGACACCTGGAGGTTGAAGAGGGCCACCTGATCGAGATGAAGACCTGC  
GAGTGGCCAAAGAGCCACACACTGTGGACAGACGGGATTGAGGAGAGCGACCTGATTATTCCCAAGAGCCTGGCCGGGCC  
ACTCAGCCACCACAACACACGGGAGGGCTACAGAACACAGATGAAGGGCCCTGGCATAGCGAGGAGCTGGAAATTAGGT  
TTGAGGAGTCCCCGGCACTAAGGTCCATGTGGAGGAGACATGCGGCACTCGGGGCCCACTGAGAAAGTACAACCTGCC  
TCAGGCAGAGTGATTGAGGAGTGGTGTGCAGGGAGTGCAATGCCCCCTGTCAATTAGGGCCAAGGACGGCTGTTG  
GTATGGCATGGAGATTCGGCCAGGAAAGAACCCGAAAGCAACCTGGTCAGGAGCATGGTCACTGCCGGCAGCACTGGCG  
GCGGCAGCGCGCGGCGACTACAAAGACGATGACGACAAGTAATGACTCGAGtaatga

**MLALGGVLIFLSTAVSADVGCSDVDFSKKETRCGTGVFVYNDVEAWRDRYKYHPDSPRRLAAAVKQAW  
EDGICGISSVSRMENIMWRSVEGELNAILEENGVQLTVVVGSVKNPMWRGPQRLPVPVNELPHGWKA  
WGKSYFVRAAKTNNSFVVDGDTLKECPLKHRAWSFLVEDHGFVGFHTSVWLKVREDYSLECDPAV  
IGTAVKGKEAVHSDLYWIESEKNDTWRLKRAHLIEMKTCEWPKSHTLWTDGIEESDLIIPKSLAGPLS  
HHNTREGYRTQMKGPWHSELEIRFECPGTVKHVEETCGTRGPSLRSTTASGRVIEEWCCRECTMP  
PLSFRAKDGWCWYGMIEIRPRKEPESNLVRSMTAGSTGGGSGGGDYKDDDDK**

**Figure S2.** Sequences of ZIKV NS1 genes and translated proteins used in this study. In top, sequence of mammalian-codon optimized NS1 gene derived from ZIKV strain BeH819015 (Genebank access : KU365778). The sequence encoding the glycine–serine spacer followed by a FLAG tag is underlined. The exogenous initiation and terminaison codons of NS1 sequence are indicated in small letters. In bottom, the sequence of recombinant full-length NS1 protein is indicated in bold. The signal peptide of NS1 is indicated in italic. The sequence of the glycine–serine spacer followed by a FLAG tag at the C-terminus of NS1 is underlined.

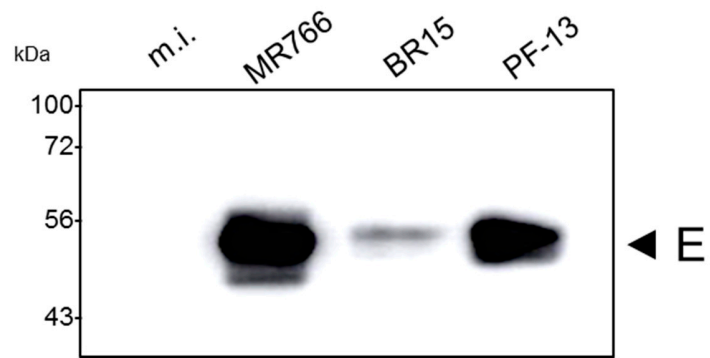

**Figure S3.** Detection of intracellular E protein in ZIKV-infected Vero cells. The lysates of ZIKV-infected Vero cells or mock-infected cells that are described in Fig.6 were probed with anti-E Mab 4G2.
